# Supplementary material for: A precursor route to single-crystalline WO3 nanoplates with an uneven surface and enhanced sensing properties
Source: Royal Society of Chemistry journal article supplement (doi:10.1039/c2dt30748k), 2012-01-01
Supplement: c2dt30748k.pdf [file c2dt30748k.pdf]

## Electronic Supplementary Information (ESI):

### Precursor route to single-crystalline WO<sub>3</sub> nanoplates with an uneven surface and enhanced sensing properties

Xiao-Xin Zou,<sup>a,b</sup> Guo-Dong Li,<sup>\*b</sup> Pei-Pei Wang,<sup>b</sup> Juan Su,<sup>a,b</sup> Jun Zhao,<sup>b</sup> Li-Jing Zhou<sup>b</sup>  
Yu-Ning Wang,<sup>a,b</sup> and Jie-Sheng Chen<sup>\*a</sup>

<sup>a</sup> School of Chemistry and Chemical Engineering, Shanghai Jiao Tong University, Shanghai 200240, China

<sup>b</sup> State Key Laboratory of Inorganic Synthesis and Preparative Chemistry, Jilin University, Changchun 130012, China

E-mail: chemcj@sjtu.edu.cn

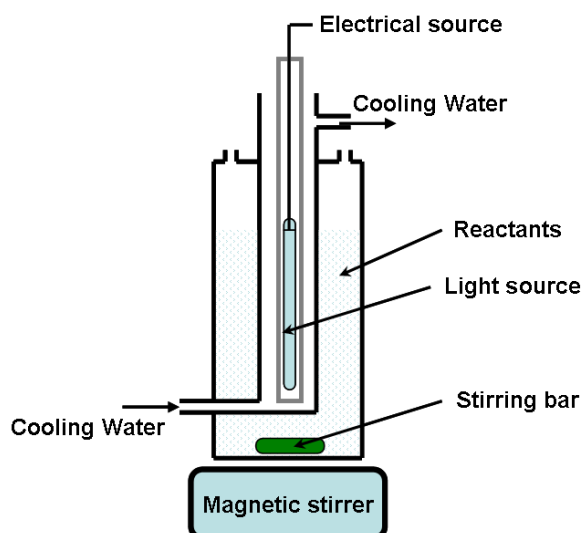

**Figure S1** Schematic drawing of quartz cylindrical cell for UV-induced reaction.

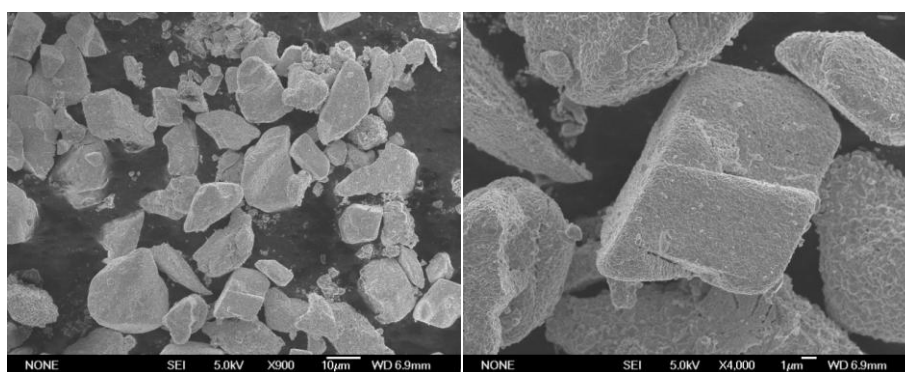

**Figure S2** SEM images of the commercially available  $\text{WO}_3$  sample.
